1

2 **Title:**

3 **Molecular signatures of selection associated with host-plant differences in *Pieris* butterflies**

4

5

6 Yu Okamura<sup>1,2</sup>, Ai Sato<sup>2</sup>, Natsumi Tsuzuki<sup>2</sup>, Masashi Murakami<sup>2</sup>, Hanna Heidel-Fischer<sup>1,3</sup> Heiko

7 Vogel<sup>1</sup>

8

9 1 Department of Entomology, Max Planck Institute for Chemical Ecology, Hans-Knöll-Str. 8,

10 07745, Jena, Germany

11 2 Community Ecology Lab, Faculty of Science, Chiba University, 263-8522, Chiba, Japan

12 3 Leibniz Institute for Natural Product Research and Infection Biology

13 Hans Knöll Institute (HKI), Beutenbergstraße 11a, 07745 Jena, Germany

14

15 **Corresponding author:**

16 Yu Okamura

17 0707yu@gmail.com

18 Key words: Insects, host plant adaptation, arms-race, positive selection

19

## 20 **Abstract**

21 Adaptive traits that enable organisms to conquer novel niches and experience subsequent  
22 diversification are ecologically and evolutionarily important. The larvae of *Pieris* butterflies  
23 express nitrile-specifier proteins (NSPs), a key innovation for overcoming the glucosinolate (GLS)-  
24 myrosinase-based defense system of their Brassicales host-plants. NSPs are a member of the NSP-  
25 like gene family, which includes the major allergen (MA) protein, a paralog of NSP with a GLS-  
26 disarming function, and a single domain major allergen (SDMA) protein, whose function is  
27 unknown. The arms-race between a highly variable host-plant defense system and members of the  
28 NSP-like gene family is suggested to mediate diversification in both Pierid butterflies and  
29 Brassicales plants. Here, we combined feeding experiments using 25 Brassicaceae plants and five  
30 *Pieris* species with larval transcriptome data to investigate the evolutionary forces acting on NSP-  
31 like gene family members associated with patterns of host-plant usage. Although we observed  
32 significantly elevated nonsynonymous to synonymous substitution ratios in NSPs, no such pattern  
33 was observed in MAs or SDMAs. Furthermore, we found a signature of positive selection of NSP  
34 at a phylogenetic branch which reflects different host-plant preferences. Our data indicate that  
35 NSPs have evolved in response to shifting preferences for host plants among five *Pieris* butterflies,  
36 whereas MAs and SDMAs appear to have more conserved functions. Our results show that the  
37 evolution and functional differentiation of key genes used in host-plant adaptation play a crucial  
38 role in the chemical arms-race between *Pieris* butterflies and their Brassicales host-plants.

39

## 40 **Introduction**

41 Key innovations that enable organisms to acquire novel niches and experience  
42 subsequent radiation are ecologically and evolutionarily important (Bond & Opell, 1988; Hunter,  
43 1998). In plant-herbivore interactions, a number of key innovations were identified that enabled  
44 herbivores to overcome specific plant defense mechanisms and colonize novel host-plants  
45 (Berenbaum, Favret, & Schuler, 1996; Janz, 2011; Wheat et al., 2007). *Pieris* butterfly larvae use  
46 plants containing glucosinolate (GLSs) as hosts, redirecting toxic breakdown products to less toxic  
47 metabolites using gut-expressed nitrile-specifier proteins (NSPs) (Wittstock et al., 2004). NSPs are  
48 known to be a key innovation of *Pieris* butterflies: the acquisition of NSPs enabled *Pieris* to  
49 colonize GLS-containing Brassicales followed by higher speciation rates compared to those of  
50 sister butterfly clades (Edger et al., 2015; Fischer, Wheat, Heckel, & Vogel, 2008; Heidel-Fischer,  
51 Vogel, Heckel, & Wheat, 2010; Wheat et al., 2007).

52 NSPs are members of the small NSP-like gene family, which includes major allergen  
53 (MA) proteins and single domain major allergen (SDMA) proteins (Fischer et al., 2008). The  
54 functions of MAs and SDMAs are mostly unclear, however, the structures of MAs and NSPs are  
55 known to be similar: three replicated domains originated from SDMAs (Fischer et al., 2008). In  
56 addition, although SDMAs are generally expressed in the guts of Lepidopteran larvae (Randall,  
57 Perera, London, & Mueller, 2013), NSP and MA are only found in Pierid butterflies feeding on  
58 Brassicales (Fischer et al., 2008). These findings suggest that in *Pieris*, MAs, as in NSPs, have a  
59 function related to disarming GLSs. The ability of MAs to redirect GLS hydrolysis was recently  
60 documented in one Brassicales-feeding Pierid, *Anthocharis cardamines*, which seems to have MA  
61 genes only, that is, it lacks NSPs (Edger et al., 2015). Thus, although the function of MAs in

62 Pieridae is largely unknown, especially in those species which have NSPs and MAs, MAs also  
63 appear to be ecologically important for overcoming the host plant's GLS-based defense system.

64 Previous studies indicated that the co-evolutionary diversification of Brassicales plants  
65 and Pierid butterflies was mediated by the chemical arms-race between the glucosinolate-  
66 myrosinase defense system and members of the NSP-like gene family (Edger et al., 2015). Past  
67 increases of GLS complexity in Brassicales were followed by the evolution in Pierid butterflies of  
68 NSP-like gene family members, suggesting that members of the NSP-like gene family would  
69 potentially be under strong selection pressure, were Pieridae butterflies to expand or shift their host  
70 plants. Such a scenario is supported by recent findings of signatures of positive selection in partial  
71 NSP sequences of a pair of *Pieris* butterflies in comparison with the signatures of 70 randomly  
72 selected genes (Heidel-Fischer et al., 2010). However, the evolutionary forces acting on all NSP-  
73 like gene family members, especially when considering the associated host plant spectrum, remains  
74 unknown.

75 Here, we focus on five Japanese butterfly species (*Pieris napi*, *P. melete*, *P. rapae*, *P.*  
76 *brassicae* and *P. canidia*) in the genus *Pieris*, which has both NSP and MA genes, and feed on  
77 Brassicaceae plants with the highest GLS diversity among the Brassicales. The five *Pieris* species  
78 have different host spectra according to field observations (Fig. 1), with *P. napi* and *P. melete*  
79 frequently using wild Brassicaceae plants (such as *Arabis* or *Arabidopsis*), whereas *P. rapae* and *P.*  
80 *brassicae* tend to feed on Brassicaceae crops and are known as major pests (Benson, Pasquale, Van  
81 Driesche, & Elkinton, 2003; Kitahara, 2016; Ohsaki & Sato, 1994; Ueno, 1997). In contrast, in  
82 Japan, *P. canidia* can be found only in the southern islands (Yonaguni Island, Okinawa), relying on  
83 the limited number of host plants, such as *Cardamine* or *Lepidium*, in their habitat range.

84 With larval transcriptome (RNA-seq) data from the five *Pieris* species, we analyzed the

85 divergence in amino acid sequences based on nonsynonymous (dN) and synonymous substitution  
86 (dS) rates to investigate signatures of selection on members of the NSP-like gene family compared  
87 with signatures on other larval-expressed orthologs. We also conducted comprehensive feeding  
88 experiments with 25 Brassicaceae plants to acquire patterns of host utilization in *Pieris* species to  
89 test if shifts in these patterns can be correlated with the evolution of NSP-like gene family members  
90 in *Pieris* butterflies. Additionally, we searched for functional gene groups with signatures of  
91 selection among the five *Pieris* species based on gene ontology (GO) and dN/dS analyses to  
92 identify potential genes related to host-plant detoxification which might be under positive or  
93 negative selection. By combining these approaches, we were able to investigate signatures of  
94 selection on ecologically important NSP-like gene family members and detoxification-related  
95 genes associated with host-plant utilization patterns in *Pieris* larvae (Fig. 2). Results provide  
96 important insights into the evolution of adaptive key innovations in *Pieris* butterflies.

97

98

## 99 **Materials and Methods**

### 100 **Feeding experiments**

101 We used four *Pieris* butterfly species for the feeding assay, leaving out *P. canidia*. We collected 7–  
102 10 female butterflies of three *Pieris* butterfly species (*P. napi*, *P. melete*, *P. rapae*) from wild  
103 populations in Chiba and Hokkaido, Japan. Most wild-caught female butterflies were already  
104 fertilized. We released the female butterflies into cages containing cabbage (*Brassica oleracea* var.  
105 *capitata*) or *Cardamine leucantha* under high-intensity light conditions, and waited for eggs to be  
106 laid. For *P. brassicae*, final-instar larvae were caught in the wild (Hokkaido, Japan), fed on cabbage  
107 and reared to the adult stage. After eclosion, 10 female butterflies were hand paired with males and  
108 eggs were collected as they were from the other species. Eggs of the four *Pieris* butterfly species  
109 were incubated at 25°C until they hatched.

110 For experimental plants, we collected seeds of 25 Brassicaceae plant species, covering a  
111 phylogenetically broad range (Table S1) (Beilstein, Al-Shehbaz, Mathews, & Kellogg, 2008;  
112 Couvreur et al., 2010; Franzke, Lysak, Al-Shehbaz, Koch, & Mummenhoff, 2011). We grew the  
113 plants in the greenhouse at 25°C, with 60% relative humidity and L16:D8. Plants were watered and  
114 fertilized every week with a 2000× diluted solution of Hyponex (N:P:K = 6:10:5; Hyponex, Osaka,  
115 Japan). After two months of cultivation, plants were used for the feeding experiments.

116 Neonate larvae were collected within 12 hours after they hatched for the feeding  
117 experiment. We transferred three neonate larvae for each plant using a soft-haired brush and  
118 replicated this twice for each plant species ( $n = 6$ ). To minimize changes in the condition of the  
119 experimental plants, experimental trials were carried out within 5 days for all four *Pieris* species.  
120 We conducted feeding experiments under the same temperature and light conditions used for plant

121 growth. We measured the weight of each larva individually (within 0.1 mg) after 120 hours of  
122 feeding and used the average weight of larval individuals from each plant species as an index of  
123 the performance of each *Pieris* butterfly species. We set the weight of dead larvae at 0.

124 Larval weights were standardized as z-scores to enable comparison between species. We  
125 calculated the mean scores of each plant treatment and used these for the comparative analysis. We  
126 conducted Pearson's correlation test and hierarchical clustering analysis to assess differences in  
127 larval performances among the four *Pieris* species. The possible clustering was evaluated with the  
128 gap statistics (Tibshirani, Walther, & Hastie, 2001). All of these analyses were performed on R  
129 studio ver. 1.1.453 (RStudioTeam, 2016).

130

### 131 **RNA sequencing**

132 From four *Pieris* butterfly species (*P. napi*, *P. melete*, *P. rapae*, *P. brassicae*), excluding *P. canidia*,  
133 we collected larvae that we used for the feeding experiments for transcriptome analysis (Figs. 1,  
134 2). We used larvae that fed on *Arabidopsis kamchatica* and *Cardamine occulta* as representatives.  
135 The larvae were flash-frozen in liquid nitrogen and stored at -80 °C until RNA extraction. We  
136 selected a single representative larva for each of the four *Pieris* and plant species combinations,  
137 and RNA was extracted using the RNeasy Mini Kit (QIAGEN). RNA sample quantity and quality  
138 were checked by Agilent 2100 Bioanalyzer. Illumina libraries of individual larva were prepared by  
139 Sure Select Strand-Specific RNA Library Preparation Kit for Illumina Multiplexed Sequencing,  
140 and RNA sequencing was performed on an Illumina HiSeq 1500 Genome Analyzer platform using  
141 a 2 x 100bp paired-end approach. For *P. canidia*, we collected larvae directly from wild *Lepidium*  
142 *virginicum* on Yonaguni Island, Okinawa, Japan. The collected larvae were dissected, and gut

143 tissues were stored at -80 °C in solution until RNA extraction. Five larvae were randomly selected,  
144 and RNA was extracted with the RNeasy Mini Kit (QIAGEN). *P. canidia* RNA concentrations were  
145 quantified on a Qubit 2 Fluorometer (Invitrogen), and a fraction of the RNA from each of the five  
146 larvae was pooled as a single sample for RNA-seq. Paired-end (2×150 bp) sequencing was  
147 performed by the Max Planck Genome Center Cologne on an Illumina HiSeq 2500 Genome  
148 Analyzer platform.

149

### 150 ***De novo* assembly, searching for reciprocal best hits (RBHs) using-BLAST**

151 Acquired reads of RNA-seq data were pooled for each species after filtering out bad quality reads  
152 by trimmomatic with the following options (LEADING:10 TRAILING:10  
153 SLIDINGWINDOW:4:20 MINLEN:40) (Bolger, Lohse, & Usadel, 2014). The quality of reads was  
154 checked by FastQC. Pooled reads were *de novo* assembled by Trinity ver. 2.0.6 (Grabherr et al.,  
155 2011). We used TransDecoder (<http://transdecoder.github.io/>) to predict open reading frames  
156 (ORFs) from the assembled contigs and subsequently looked for reciprocal best hits (RBHs) using  
157 BLAST alignment methods to analyze amino acid sequences (longer than 100 amino acids)  
158 predicted by TransDecoder (Camacho et al., 2009; Cock, Chilton, Grüning, Johnson, & Soranzo,  
159 2015). We used RBH BLAST software with default settings on all possible species pairs (10 pairs)  
160 and subsequently extracted *P. rapae* orthologs from this RBH result and ran blastp on the amino  
161 acid sequences against a *P. rapae* protein database to confirm the ORF prediction from  
162 TransDecoder. Orthologs in the RBH result without any BLAST hits to the *P. rapae* protein  
163 database were removed since these amino acid sequences may have resulted from wrong ORF  
164 predictions by TransDecoder. We used PRANK to conduct codon-based alignment of each ortholog  
165 set acquired from the RBH result (Loytynoja & Goldman, 2005).



166

### 167 **Phylogenetic tree construction**

168 We reconstructed a phylogeny of the five *Pieris* species using the transcriptome data by  
169 concatenating all aligned ortholog nucleotide sequences into one sequence for each species,  
170 generating an Maximum Likelihood (ML) phylogenetic tree by IQ-tree (Nguyen, Schmidt, Von  
171 Haeseler, & Minh, 2015) after removing gaps with TrimAl (2063074 bp remaining) (Capella-  
172 Gutiérrez, Silla-Martínez, & Gabaldón, 2009). We used the GTR + gamma substitution model and  
173 set ultrafast bootstrap approximation iterations as 1000, using -bnni options to construct a  
174 phylogeny of the five *Pieris* species (Hoang, Chernomor, Von Haeseler, Minh, & Vinh, 2018).

175

### 176 **Analysis of NSP-like gene family members**

177 We used each aligned orthologous gene for calculating species pairwise dN/dS ratios using PAML  
178 4.8 (Yang, 2007). We used runmode = -2 and NSsites = 0 option in codeml from PAML and  
179 calculated pairwise dN/dS ratios based on the Nei & Gojobori method (Nei & Gojobori, 1986). We  
180 averaged acquired species pairwise dN/dS ratios for each ortholog to infer putative positive  
181 selection among the genus. The dN/dS values of NSP-like gene family members were compared  
182 with the entire dN/dS distributions of all ortholog sets in species pairwise associations and also in  
183 an averaged dN/dS scale among *Pieris*.

184 We used the branch-site model to identify cases of positive selection on NSP-like gene  
185 family members in a specific branch. We prepared molecular phylogeny of NSP gene family  
186 members by RAxML (Stamatakis, 2014) and tested all branches using codeml model 2 with  
187 NSsites = 2 option and ran an alternative model; varied dN/dS ratios across sites as well as lineages  
188 were allowed (fixed\_omega = 0), and null model; fixed dN/dS (fixed\_omega = 1). We conducted

189 a likelihood ratio test (LRT) with the chi-square distribution to evaluate significant differences  
190 between the alternative and null models. We also used adaptive Branch-Site Random Effects  
191 Likelihood (aBSREL) analysis for the NSP-like gene members among the five *Pieris* species and  
192 tested all branches to identify the signatures of positive selection (Smith et al., 2015). Acquired *P*  
193 values were corrected with false discovery rates (FDRs) in each analysis. Signs of positive selection  
194 on each site were identified by the Bayes empirical Bayes (BEB) analysis (0.90 cut offs). The  
195 aBSREL analyses were performed in HyPhy implemented in the datamonkey web server  
196 (Kosakovsky Pond, Frost, & Muse, 2005; Weaver et al., 2018).

197

#### 198 **GO annotation and evolutionary tests**

199 We used *P. rapae* contigs from the RBH result for GO annotation and ran these genes against the  
200 NCBI non-redundant protein sequence database in Galaxy (Blastx, e-value = 10e-4). We  
201 subsequently used the Blast2GO platform to load the resulting Blast-xml file and to conduct  
202 mapping and annotation steps based on the BLAST result for acquiring GO annotations for each  
203 contig (Götz et al., 2008). To test significantly elevated or decreased dN/dS ratios among genes  
204 associated with specific GO terms, we selected those that contained at least 20 orthologs and tested  
205 their dN/dS distributions with those of all the observed orthologs (background) using a Wilcoxon  
206 test. All statistical analyses were performed in R studio ver. 1.1.453 and *P* values acquired were  
207 adjusted by FDR (RStudioTeam, 2016).

208

## 209 **Results**

### 210 **Performance of four *Pieris* butterflies on 25 Brassicaceae plants.**

211 We obtained larval weights for four *Pieris* butterfly species (*Pieris napi*, *P. melete*, *P. rapae* and *P.*  
212 *brassicae*) feeding on 25 different Brassicaceae plant species. Analysis showed that the larval  
213 performances of the four *Pieris* species could be clustered into two groups: the *P. napi*-*P. melete*  
214 group and the *P. rapae*-*P. brassicae* group. The gap statistics for the given number of clusters were  
215 as follows:  $Gap_1 = 0.080$ ,  $Gap_2 = 0.135$ ,  $Gap_3 = 0.119$ ,  $Gap_4 = 0.123$  (Fig. 3). For instance, we  
216 observed that *P. napi* and *P. melete* performed better on *Arabis hirsuta* or *Turritis glabra*, whereas  
217 *P. rapae* and *P. brassicae* did better on *Thlaspi arvense* than the other two species (Fig. 3). In  
218 addition to this trend, the larvae of four *Pieris* butterfly species also performed similarly. We  
219 observed that all four *Pieris* species performed better on *Cardamine occulta* than on the other plant  
220 species tested and did not perform well on *Erysimum cheiranthoides* or *Berteroa incana* (Fig. 3).

221

### 222 **RNA-seq, reciprocal best hit (RBH) BLAST analysis of *Pieris* butterflies**

223 We obtained 32-40 million Illumina 100 bp pair-end reads for the four species (*P. napi*, *P. melete*,  
224 *P. rapae* and *P. brassicae*) and 64 million Illumina 150 bp pair-end reads for *P. canidia*. *De novo*  
225 transcriptome assemblies using Trinity resulted in 64,279; 62,054; 59,327; 53,004; and 149,481  
226 contigs, and in N50 values of 2,048 bp; 2,132 bp; 2,060 bp; 2,594; and 2,075 bp for *P. napi*, *P.*  
227 *melete*, *P. rapae*, *P. brassicae*, and *P. canidia* respectively. Using RBH BLAST on the five *Pieris*  
228 species, we obtained transcriptome data resulted in 2723 ortholog sets.

229

### 230 **Identifying signatures of selection on NSP-like gene family members**

231 We calculated dN/dS ratios for all ortholog sets in the 10 *Pieris* species pairs used with PAML 4.8  
232 (Yang, 2007) and averaged these values. The complete distribution of averaged dN/dS values is  
233 shown in Figure 4 (mean dN/dS = 0.10486). The averaged dN/dS values of NSP-like gene family  
234 members are as follows:  $dN/dS_{NSP} = 0.324$ ,  $dN/dS_{MA} = 0.188$  and  $dN/dS_{SDMA} = 0.125$ . The dN/dS  
235 value of NSP is located in the top 2.72% of the entire dN/dS distribution, whereas MA and SDMA  
236 values are lower (MA 11.4%, SDMA 23.4%). We also found a similar pattern between species,  
237 where NSPs were in the top 5% in 5 pairs out of 10 (*napi* – *rapae*, *napi* – *canidia*, *melete* – *rapae*,  
238 *melete* – *canidia*, *rapae* – *canidia*) and in the top 5.5% in two pairs (*napi* – *brassicae*, *melete* –  
239 *brassicae*); MAs and SDMAs were not ranked in the top 5 % (Fig. 5). In most cases, NSPs had the  
240 highest value, MAs had higher dN/dS value compared to SDMAs, and the order of dN/dS values  
241 of NSP-like gene family members was NSP > MA > SDMA in 8 out of 10 species pairs (Fig. 5).

242

### 243 **Signature of clade-specific positive selections on NSP associated with larval performance**

244 We reconstructed Japanese *Pieris* phylogeny using the transcriptome data by concatenating all  
245 RBH ortholog sets. The obtained results showed a highly supported *P. napi*–*P. melete* clade, and *P.*  
246 *rapae*–*P. canidia* clade (Fig. 5). We performed the branch-site model approach by codeml and  
247 found a signal of positive selection on NSPs at the *P. napi*–*P. melete* branch (FDR adjusted  $P =$   
248 0.0178, LRT), however, we found no sign of positive selection at other branches or in MA or SDMA  
249 genes (Fig. 5, Table 1). The BEB analysis suggested that two codon sites had signs of positive  
250 selection in NSPs in this branch (Table 1, posterior probability > 0.9). These sites were located in  
251 second and third domains of NSPs (position 421 and 503 in the amino acid sequence) and close to  
252 the positively selected sites identified in previous work (positions 379 and 523) (Heidel-Fischer et  
253 al., 2010). The aBSREL analyses also detected a signature of positive selection on NSP genes only

254 at the *P. napi*–*P. melete* branch (FDR adjusted  $P = 0.010$ ), whereas no branch-specific positive  
255 selection was detected in MA and SDMA genes (Table 2).

256

### 257 **GO terms with elevated dN/dS ratios among five *Pieris* butterflies**

258 After GO annotations of all *P. rapae* RBH contigs, we obtained 1457 GO terms in our datasets.  
259 These included 680 related to biological process, 540 to molecular function, and 237 to cellular  
260 component GO terms. We conducted the Wilcoxon test for the GO terms, which have more than  
261 20 assigned orthologs, and the result revealed that one biological process -- “proteolysis” -- and  
262 two processes associated with molecular function -- “hydrolase activity” and “serine-type  
263 endopeptidase activity” -- had significantly elevated dN/dS values when compared to the entire  
264 dN/dS distribution of all contigs (Fig. 6, Table 3). This test also showed that 13 GO terms had  
265 significantly lower dN/dS values in the three categories (Table 3). These lower dN/dS GO terms  
266 included “regulation of transcription, DNA-templated,” “ribosome biogenesis,” and “translation”  
267 in biological process; “ATP binding,” “structural constituent of ribosome,” “GTP binding,”  
268 “calcium ion binding,” “DNA-binding transcription factor activity” and “sequence-specific DNA  
269 binding” in molecular functions; and “nucleus,” “cytoplasm,” “ribosome” and “transcription factor  
270 complex” in the category of GO cellular components.

271

272

## 273 **Discussions**

274 Focusing on five Japanese *Pieris* butterflies, we tested host-plant performance and investigated  
275 signatures of selection on NSP-like genes, which are a key innovation of these butterflies to  
276 overcome the GLS defense system of their Brassicales host plants (Edger et al., 2015; Wheat et al.,  
277 2007). We acquired RBH ortholog sets expressed in larvae of the five *Pieris* species based on  
278 transcriptome data and compared the calculated dN/dS ratios of each ortholog in order to  
279 investigate the effect of evolutionary forces on NSP-like gene family members. We also combined  
280 ecological approaches for acquiring performance data on larvae of *Pieris* species by conducting  
281 comprehensive feeding experiment using 25 Brassicaceae plant species. These approaches yielded  
282 four major findings. First, we observed that *Pieris* species showed clade-specific differences in  
283 larval host performance. Second, we observed that NSP genes had significantly elevated dN/dS  
284 ratios compared to other genes in the five *Pieris* species, including members of the same gene  
285 family, MAs and SDMAs. Third, evidence of positive selection on NSPs was observed at a  
286 phylogenetic branch which showed differences in larval performance according to our feeding  
287 assays. Last, we observed significantly elevated dN/dS ratios in GO terms which are associated  
288 with potential detoxification-related genes in *Pieris* larvae.

289  
290           According to our feeding experiments with four Japanese *Pieris* species (*P. napi*, *melete*,  
291 *rapae* and *brassicae*) and 25 Brassicaceae plant species, *P. napi* and *P. melete* larvae performed  
292 similarly, as did *P. rapae* and *P. brassicae* larvae (Fig. 3). Observations in the field suggest that  
293 these four *Pieris* species have slightly different host preferences: *P. napi* and *P. melete* feed on wild  
294 and montane Brassicaceae plants, such as *Arabis* or *Turritis*, and *P. rapae* and *brassicae* use

295 Brassicaceae crops more often than the other two species (Fig. 1) (Harvey, Poelman, & Gols, 2010;  
296 Ohsaki & Sato, 1994). Thus, our results confirm the field observations (Fig. 3). Phylogenetic  
297 analysis showed that the *P. napi* and *P. melete* clade was strongly supported, and the species  
298 phylogeny seemed to correspond with larval performance (Fig. 5), suggesting that the larval host  
299 preferences of the four *Pieris* butterflies are phylogenetically conserved. In this study, we did not  
300 perform any physical or chemical defense analyses on the different Brassicaceae plants species we  
301 used; however, a number of previous studies revealed that the GLS profiles of Brassicaceae plants  
302 can differ dramatically among Brassicaceae species (Agerbirk & Olsen, 2012; Fahey, Zalcmann,  
303 & Talalay, 2001; Olsen et al., 2016). Our results suggest that *Pieris* species might not always be  
304 capable of fully adapting to the defenses in the ranges of their potential host plants and so likely  
305 evolved to feed on a subset of Brassicaceae plants.

306  
307 Comparing averaged dN/dS ratios among all species pairs for each ortholog, we found  
308 that only NSPs had higher dN/dS values among NSP-like gene family members (Fig. 4). Although  
309 we filtered out a number of genes by RBH processes and therefore compared only a subset of the  
310 entire orthologs, our finding strongly suggests that NSPs are under positive selection – or, more  
311 relaxed purifying selection -- among the five *Pieris* butterfly species. In our interspecies dN/dS  
312 comparison, we also observed that NSPs had higher dN/dS values than the other ortholog sets in  
313 most of the species pairs (they were located in the top 5.5% in 7 out of 10 species pairs), supporting  
314 the hypothesis of positive selection on NSPs in this genus (Fig. 5). In previous research, which  
315 calculated dN/dS values from partial NSP sequences of *P. rapae* and *P. brassicae* with 70 other  
316 genes, higher dN/dS values of NSPs were observed (dN/dS = 0.25 ranked in the top 5%) (Heidel-  
317 Fischer et al., 2010). We found that dN/dS values in our dataset from entire NSP mRNA sequences

318 of this species pair were 0.257, which ranked in the top 6.06 %, thus supporting previous findings.  
319 Interestingly, we also found that in most cases MAs had lower dN/dS values compared to NSPs (in  
320 both averaged dN/dS ratios and interspecies comparisons) (Figs. 4, 5), and their dN/dS values did  
321 not reach the top 5%, suggesting that in this genus, MAs are under stronger purifying selection  
322 than are NSPs. NSPs and MAs are known as paralogs, and only NSP was confirmed to have GLS-  
323 disarming activity in *Pieris*. However, MAs also disarm GLSs in another Brassicaceae-feeding  
324 Pierid genus, *Anthocharis*, which has only MAs (Edger et al., 2015); this overlap strongly suggests  
325 that in *Pieris* MAs act like NSPs. Our results show that selection on these two paralogous genes,  
326 both of which have similar structure and can potentially disarm GLSs, can differ strikingly. This  
327 could imply that these paralogs have differentially functionalized in *Pieris*, where NSPs have more  
328 derived functions, whereas MAs have more conservative functions. DN/dS values of SDMAs were  
329 lowest among all NSP-like gene family members and also had similar values compared to the  
330 average of all the orthologous sets. This similarity suggests that SDMAs are under strong purifying  
331 selection and have a conserved function in *Pieris*. Expressed in the gut, SDMAs are known to be  
332 found in all Lepidoptera, supporting the hypothesis that their function is related to digestion  
333 (Fischer et al., 2008; Randall et al., 2013).

334  
335 Using the branch-site model analysis by codeml, we detected evidence of positive  
336 selection only in NSPs at the *P. napi-melete* branch (Table 1). Testing all possible branches of all  
337 NSP-like gene family members with aBSREL, we detected signatures of positive selection in NSPs  
338 only at this branch (Table 2). Based on our comprehensive feeding experiment and phylogenetic  
339 analyses, we found that the *P. napi-melete* branch had different host preferences from *P. rapae* and  
340 *P. brassicae* (Figs. 2, 4). These results suggest that host-plant preferences in *Pieris* were associated



341 with the evolution of NSPs but not MAs or SDMAs. In this study, we did not test the functional  
342 differences of NSPs among the five *Pieris* species. Furthermore, we could not determine whether  
343 the differences in larval performances that we observed among the four *Pieris* species were caused  
344 by the dissimilarity among the GLS profiles of the host plants. However, our findings imply a  
345 strong relationship between the evolution of NSPs and host-utilization patterns among *Pieris*  
346 butterflies. Moreover, it is also interesting that only NSPs showed this signature of selection,  
347 suggesting that NSPs have been functionalized to detoxify GLSs specific to certain plant species;  
348 in contrast, MAs may have evolved to disarm the widespread types of GLSs such as are found  
349 universally across Pieridae host plants. In addition, we found positively selected sites in the second  
350 and third domains of NSPs, and in earlier population genetic work using *P. rapae* (Heidel-Fischer  
351 et al., 2010). Although the molecular mechanisms of the GLS-disarming function of NSPs and  
352 MAs are still unclear, our results suggest that the second and third domains of NSPs are important  
353 for substrate specificity.

354  
355         Besides individual NSP gene family members, elevated dN/dS values were also more  
356 broadly observed among the five *Pieris* butterflies in several GO categories, including “proteolysis”  
357 (biological process), and “serine-type endopeptidase activity” and “hydrolase activity” (molecular  
358 function). In Lepidopteran larvae, most of the digestive enzymes are involved in proteolysis (Simon  
359 et al., 2015) and several classes of digestive enzymes are necessary for insect herbivores to acquire  
360 essential nutrients in appropriate amounts (Broadway, 1989). In *Pieris*, these proteolytic activities  
361 were dominated by serine endopeptidases (Broadway, 1996). Since plants also have varied species-  
362 specific protease inhibitors to inhibit protease activity in herbivores, herbivores need to have  
363 evolved inhibitor-resistant proteinases as a counter adaptation (Bolter & Jongmsa, 1997). Our

364 findings showed signs of positive selection in protease-related genes among five *Pieris* species,  
365 suggesting that these genes have accumulated more functional changes as a consequence of  
366 interactions with plants in their specific host-plant ranges. A number of genes with hydrolase  
367 activity are included in genes related to detoxification in herbivores (Simon et al., 2015). Previous  
368 research has uncovered differential gene regulation of this GO term member in several herbivore  
369 species responding to different host-plants (Schweizer, Heidel-Fischer, Vogel, & Reymond, 2017).  
370 Therefore, a sign of positive selection or relaxed purifying selection on this GO member may also  
371 be associated with the host-plant spectra in *Pieris* butterflies.

372  
373           To uncover the co-evolutionary diversification of plants and herbivores, it is important  
374 to understand the molecular interactions between all involved partners. We found the signature of  
375 positive selection on NSPs in a Pieridae genus, *Pieris*, associated with respective host-plant usage.  
376 It seems that the evolution of host-plant adaptive genes is correlated with patterns of host-plant  
377 usage in this *Pieris* butterfly genus. Moreover, we also observed that MAs, which are paralogs of  
378 NSPs, are under more strict purifying selection than NSPs. Our findings combine results from  
379 genetic and ecological assays to focus on how the evolution of these two paralogous genes may  
380 affect the arms-race between Brassicales and *Pieris* butterflies and their consequent diversification.  
381 Functional assays focusing on selected sites will increase our understanding of the evolution and  
382 functional differentiation of NSPs and MAs and how *Pieris* adapted evolutionarily to diverse  
383 glucosinolates in their host plants.

384

## 385 **Acknowledgements**

386 We are grateful to Takashi Tsuchimatsu for useful discussions and comments on this study. We  
387 thank Emily Wheeler, Boston, for editorial assistance. This work was supported by a Grant-in-Aid  
388 for Scientific Research from the Japan Society for the Promotion of Science (15J00320 to Y.O.)  
389 and partially by Max-Planck-Gesellschaft.

390

## 391 **References**

- 392 Agerbirk, N., & Olsen, C. E. (2012). Glucosinolate structures in evolution. *Phytochemistry*, *77*,  
393 16–45. doi:10.1016/j.phytochem.2012.02.005
- 394 Beilstein, M. A., Al-Shehbaz, I. A., Mathews, S., & Kellogg, E. A. (2008). Brassicaceae  
395 phylogeny inferred from phytochrome A and ndhF sequence data: tribes and trichomes  
396 revisited. *American Journal of Botany*, *95*(10), 1307–1327. doi:10.3732/ajb.0800065
- 397 Benson, J., Pasquale, A., Van Driesche, R., & Elkinton, J. (2003). Assessment of risk posed by  
398 introduced braconid wasps to *Pieris virginiensis*, a native woodland butterfly in New  
399 England. *Biological Control*, *26*(1), 83–93. doi:10.1016/S1049-9644(02)00119-6
- 400 Berenbaum, M. R., Favret, C., & Schuler, M. A. (1996). On defining “key innovations” in an  
401 adaptive radiation: Cytochrome P450s and Papilionidae. *The American Naturalist*, *148*,  
402 139–155. doi:10.1086/285907
- 403 Bolger, A. M., Lohse, M., & Usadel, B. (2014). Trimmomatic: A flexible trimmer for Illumina  
404 sequence data. *Bioinformatics*, *30*(15), 2114–2120. doi:10.1093/bioinformatics/btu170
- 405 Bolter, C., & Jongsma, M. A. (1997). The adaptation of insects to plant protease inhibitors.  
406 *Journal of Insect Physiology*, *43*(10), 885–895.
- 407 Bond, J. E., & Opell, B. D. (1988). Testing adaptive radiation and key innovation hypotheses in  
408 spiders. *Evolution*, *52*(2), 403–414.
- 409 Broadway, R. M. (1989). Characterization and ecological implications of midgut proteolytic  
410 activity in Larval *Pieris rapae* and *Trichoplusia ni*. *Journal of Chemical Ecology*, *15*(7),  
411 2102–2113.
- 412 Broadway, R. M. (1996). Dietary proteinase inhibitors alter complement of midgut proteases.  
413 *Archives of Insect Biochemistry and Physiology*, *32*(1), 39–53.
- 414 Camacho, C., Coulouris, G., Avagyan, V., Ma, N., Papadopoulos, J., Bealer, K., & Madden, T. L.  
415 (2009). BLAST+: Architecture and applications. *BMC Bioinformatics*, *10*, 1–9.  
416 doi:10.1186/1471-2105-10-421
- 417 Capella-Gutiérrez, S., Silla-Martínez, J. M., & Gabaldón, T. (2009). trimAl: a tool for automated  
418 alignment trimming in large-scale phylogenetic analyses. *Bioinformatics (Oxford, England)*,  
419 *25*(15), 1972–1973. doi:10.1093/bioinformatics/btp348
- 420 Cock, P. J. A., Chilton, J. M., Grüning, B., Johnson, J. E., & Soranzo, N. (2015). NCBI BLAST+  
421 integrated into Galaxy. *GigaScience*, *4*(39). doi:10.1186/s13742-015-0080-7
- 422 Couvreur, T. L. P., Franzke, A., Al-Shehbaz, I. A., Bakker, F. T., Koch, M. A., & Mummenhoff,  
423 K. (2010). Molecular phylogenetics, temporal diversification, and principles of evolution in  
424 the mustard family (Brassicaceae). *Molecular Biology and Evolution*, *27*(1), 55–71.  
425 doi:10.1093/molbev/msp202
- 426 Edger, P. P., Heidel-Fischer, H. M., Bekaert, M., Rota, J., Glöckner, G., Platts, A. E., ... Wheat,  
427 C. W. (2015). The butterfly plant arms-race escalated by gene and genome duplications.  
428 *Proceedings of the National Academy of Sciences of the United States of America*, *112*,

- 429 8362–8366. doi:10.1073/pnas.1503926112
- 430 Fahey, J. W., Zalcman, A. T., & Talalay, P. (2001). The chemical diversity and distribution of  
431 glucosinolates and isothiocyanates among plants. *Phytochemistry*, *56*(1), 5–51.
- 432 Fischer, H. M., Wheat, C. W., Heckel, D. G., & Vogel, H. (2008). Evolutionary origins of a novel  
433 host plant detoxification gene in butterflies. *Molecular Biology and Evolution*, *25*(5), 809–  
434 820. doi:10.1093/molbev/msn014
- 435 Franzke, A., Lysak, M. A., Al-Shehbaz, I. A., Koch, M. A., & Mummenhoff, K. (2011). Cabbage  
436 family affairs: the evolutionary history of Brassicaceae. *Trends in Plant Science*, *16*(2),  
437 108–116. doi:10.1016/j.tplants.2010.11.005
- 438 Götz, S., García-Gómez, J. M., Terol, J., Williams, T. D., Nagaraj, S. H., Nueda, M. J., ...  
439 Conesa, A. (2008). High-throughput functional annotation and data mining with the  
440 Blast2GO suite. *Nucleic Acids Research*, *36*(10), 3420–3435. doi:10.1093/nar/gkn176
- 441 Grabherr, M. G., Haas, B. J., Yassour, M., Levin, J. Z., Thompson, D. A., Amit, I., ... Regev, A.  
442 (2011). Full-length transcriptome assembly from RNA-Seq data without a reference  
443 genome. *Nature Biotechnology*, *29*(7), 644–652. doi:10.1038/nbt.1883
- 444 Harvey, J. A., Poelman, E. H., & Gols, R. (2010). Development and host utilization in *Hyposoter*  
445 *ebeninus* (Hymenoptera: Ichneumonidae), a solitary endoparasitoid of *Pieris rapae* and *P.*  
446 *brassicae* caterpillars (Lepidoptera: Pieridae). *Biological Control*, *53*(3), 312–318.  
447 doi:10.1016/j.biocontrol.2010.02.004
- 448 Heidel-Fischer, H. M., Vogel, H., Heckel, D. G., & Wheat, C. W. (2010). Microevolutionary  
449 dynamics of a macroevolutionary key innovation in a Lepidopteran herbivore. *BMC*  
450 *Evolutionary Biology*, *10*, 60. doi:10.1186/1471-2148-10-60
- 451 Hoang, D. T., Chernomor, O., Von Haeseler, A., Minh, B. Q., & Vinh, L. S. (2018). UFBoot2:  
452 Improving the ultrafast bootstrap approximation. *Molecular Biology and Evolution*, *35*(2),  
453 518–522. doi:10.1093/molbev/msx281
- 454 Hunter, J. P. (1998). Key innovation and the ecology of macroevolution. *Trends in Ecology &*  
455 *Evolution*, *13*(1), 31–36.
- 456 Janz, N. (2011). Ehrlich and Raven revisited: mechanisms underlying codiversification of plants  
457 and enemies. *Annual Review of Ecology, Evolution, and Systematics*, *42*(1), 71–89.  
458 doi:10.1146/annurev-ecolsys-102710-145024
- 459 Kitahara, H. (2016). Oviposition plants and seasonal migratory movements of sympatric *Pieris*  
460 *melete* and *P. napi japonica* (Lepidoptera, Pieridae). *Lepidoptera Science*, *67*(1), 32–40.
- 461 Kosakovsky Pond, S. L., Frost, S. D. W., & Muse, S. V. (2005). HyPhy: Hypothesis testing using  
462 phylogenies. *Bioinformatics*, *21*(5), 676–679. doi:10.1093/bioinformatics/bti079
- 463 Loytynoja, A., & Goldman, N. (2005). An algorithm for progressive multiple alignment of  
464 sequences with insertions. *Proceedings of the National Academy of Sciences*, *102*(30),  
465 10557–10562. doi:10.1073/pnas.0409137102
- 466 Nei, M., & Gojoborit, T. (1986). Simple methods for estimating the numbers of synonymous and  
467 nonsynonymous nucleotide substitutions. *Molecular Biology and Evolution*, *3*(5), 418–426.  
468 doi:10.1093/oxfordjournals.molbev.a040410
- 469 Nguyen, L. T., Schmidt, H. A., Von Haeseler, A., & Minh, B. Q. (2015). IQ-TREE: A fast and  
470 effective stochastic algorithm for estimating maximum-likelihood phylogenies. *Molecular*  
471 *Biology and Evolution*, *32*(1), 268–274. doi:10.1093/molbev/msu300
- 472 Ohsaki, N., & Sato, Y. (1994). Food plant choice of *Pieris* butterflies as a trade-off between  
473 parasitoid avoidance and quality of plants. *Ecology*, *75*(1), 59–68. doi:10.2307/1939382

- 474 Olsen, C. E., Huang, X. C., Hansen, C. I. C., Cipollini, D., Ørgaard, M., Matthes, A., ...  
475 Agerbirk, N. (2016). Glucosinolate diversity within a phylogenetic framework of the tribe  
476 Cardamineae (Brassicaceae) unraveled with HPLC-MS/MS and NMR-based analytical  
477 distinction of 70 desulfoglucosinolates. *Phytochemistry*, *132*, 33–56.  
478 doi:10.1016/j.phytochem.2016.09.013
- 479 Randall, T. A., Perera, L., London, R. E., & Mueller, G. A. (2013). Genomic, RNAseq, and  
480 molecular modeling evidence suggests that the major allergen domain in insects evolved  
481 from a homodimeric origin. *Genome Biology and Evolution*, *5*(12), 2344–2358.  
482 doi:10.1093/gbe/evt182
- 483 RStudioTeam. (2016). RStudio: Integrated Development for R. Retrieved from  
484 <http://www.rstudio.com>
- 485 Schweizer, F., Heidel-Fischer, H., Vogel, H., & Reymond, P. (2017). *Arabidopsis* glucosinolates  
486 trigger a contrasting transcriptomic response in a generalist and a specialist herbivore. *Insect*  
487 *Biochemistry and Molecular Biology*, *85*, 21–31. doi:10.1016/j.ibmb.2017.04.004
- 488 Simon, J.-C., d'Alençon, E., Guy, E., Jacquin-Joly, E., Jaquier, J., Nouhaud, P., ... Streiff, R.  
489 (2015). Genomics of adaptation to host-plants in herbivorous insects. *Briefings in*  
490 *Functional Genomics*, *14*(6), 413–423. doi:10.1093/bfgp/elv015
- 491 Smith, M. D., Wertheim, J. O., Weaver, S., Murrell, B., Scheffler, K., & Kosakovsky Pond, S. L.  
492 (2015). Less is more: An adaptive branch-site random effects model for efficient detection  
493 of episodic diversifying selection. *Molecular Biology and Evolution*, *32*(5), 1342–1353.  
494 doi:10.1093/molbev/msv022
- 495 Stamatakis, A. (2014). RAxML version 8: A tool for phylogenetic analysis and post-analysis of  
496 large phylogenies. *Bioinformatics*, *30*(9), 1312–1313. doi:10.1093/bioinformatics/btu033
- 497 Tibshirani, R., Walther, G., & Hastie, T. (2001). Estimating the number of clusters in a data set  
498 via the gap statistic. *Journal of the Royal Statistical Society. Series B: Statistical*  
499 *Methodology*, *63*(2), 411–423. doi:10.1016/j.scico.2012.08.004
- 500 Ueno, M. (1997). A note on the large white, *Pieris brassicae*.(I). *Yadoriga*, *169*, 25–41.
- 501 Weaver, S., Shank, S. D., Spielman, S. J., Li, M., Muse, S. V., & Kosakovsky Pond, S. L. (2018).  
502 Datamonkey 2.0: A modern web application for characterizing selective and other  
503 evolutionary processes. *Molecular Biology and Evolution*, *35*(3), 773–777.  
504 doi:10.1093/molbev/msx335
- 505 Wheat, C. W., Vogel, H., Wittstock, U., Braby, M. F., Underwood, D., & Mitchell-Olds, T.  
506 (2007). The genetic basis of a plant-insect coevolutionary key innovation. *Proceedings of*  
507 *the National Academy of Sciences of the United States of America*, *104*(51), 20427–20431.  
508 doi:10.1073/pnas.0706229104
- 509 Wittstock, U., Agerbirk, N., Stauber, E. J., Olsen, C. E., Hippler, M., Mitchell-Olds, T., ...  
510 Vogel, H. (2004). Successful herbivore attack due to metabolic diversion of a plant chemical  
511 defense. *Proceedings of the National Academy of Sciences of the United States of America*,  
512 *101*(14), 4859–4864. doi:10.1073/pnas.0308007101
- 513 Yang, Z. (2007). PAML 4: Phylogenetic analysis by maximum likelihood. *Molecular Biology*  
514 *and Evolution*, *24*(8), 1586–1591. doi:10.1093/molbev/msm088
- 515  
516

517 **Data Accessibility**

518 The RNA-seq short read data have been deposited in the EBI short read archive (SRA) with the  
519 following sample accession numbers: ERX2829492-ERX2829499. The complete study can also  
520 be accessed directly using the following URL: <http://www.ebi.ac.uk/ena/data/view/PRJEB29048>.

521

522 **Author Contributions**

523 Y.O., A.S., and N.T. carried out the laboratory work. Y.O., M.M., H.H.F. and H.V. conceived,  
524 designed and coordinated the study. Y.O., M.M., H.H.F. and H.V. wrote the manuscript. All authors,  
525 drafted parts of the manuscript, gave approval for publication and agree to be accountable for the  
526 content.

527

528

529

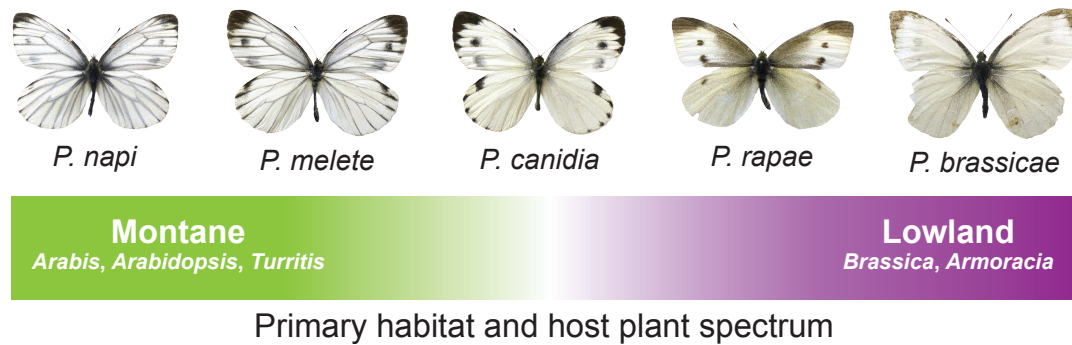

530  
531 **Fig. 1**  
532 Field observations of primary habitat and larval host-plant spectra of five *Pieris* butterflies in  
533 Japan. *P. napi* and *P. melete* tend to be found in montane habitat and rely mostly on Brassicaceae  
534 plants in forests; these include *Arabis*, *Arabidopsis* or *Turritis*. *P. rapae* and *P. brassicae* are  
535 known as Brassica crop pests. In Japan, *P. canidia* can only be found in a restricted area and uses  
536 *Cardamine* or *Lepidium* as host plants.  
537

538

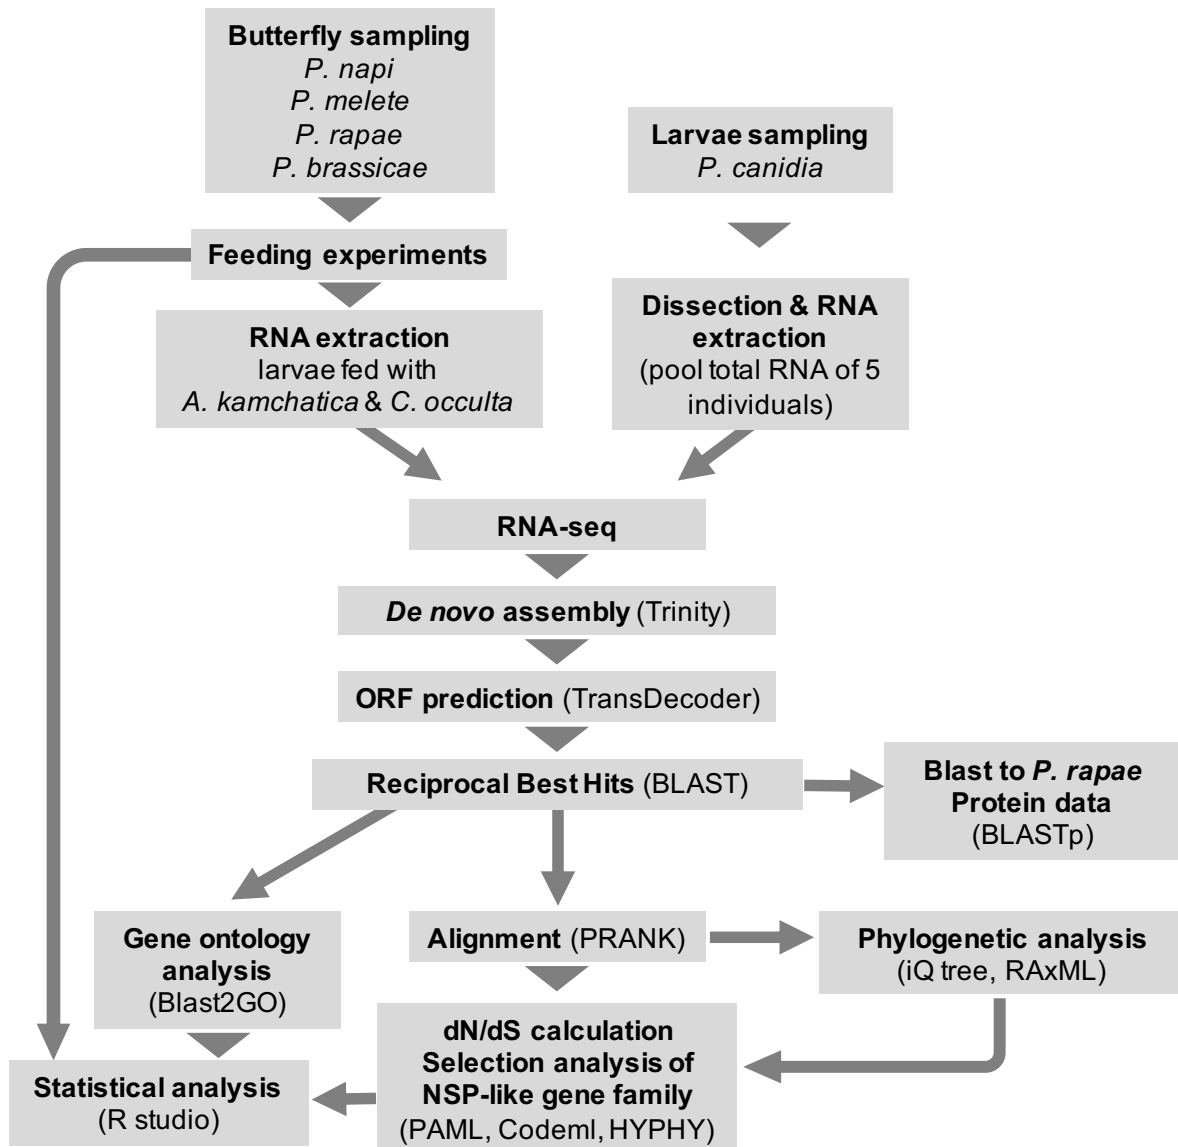

539

540

**Fig. 2**

541

Analysis pipeline used to compare dN/dS ratios of NSP-like gene family members with all observed ortholog sets from the reciprocal best hit using BLAST across five *Pieris* butterflies.

542

Signatures of selection on NSP-like gene family members were investigated in each phylogenetic

543

branch and compared with the results of the feeding assay.

544

545



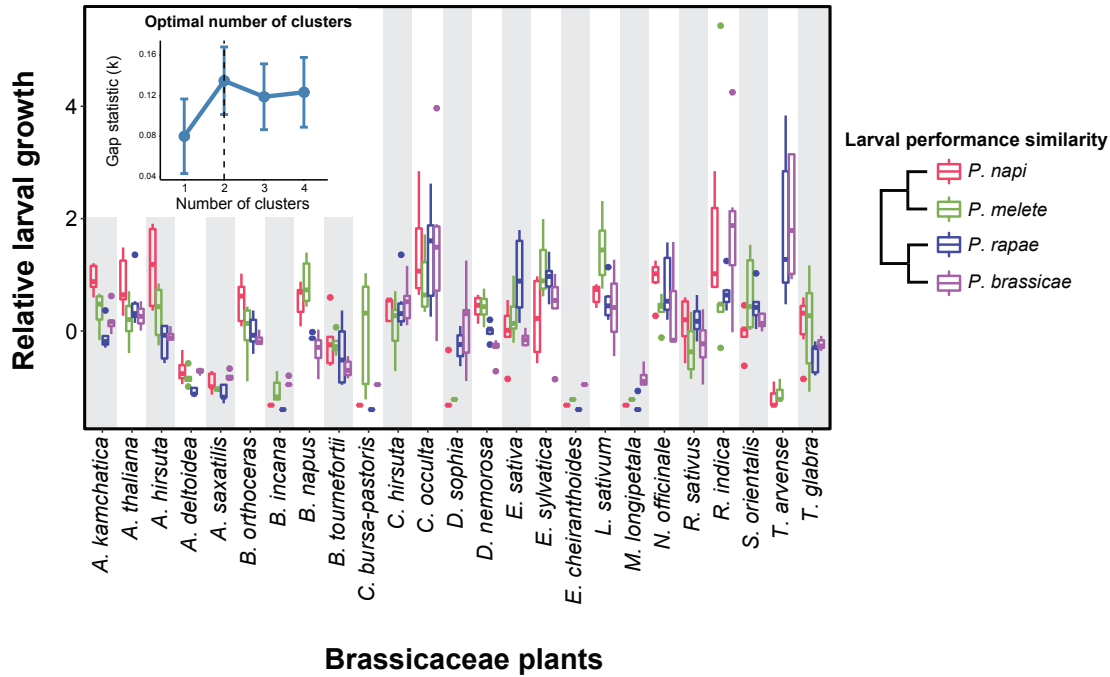

546  
547 **Fig. 3**  
548 Feeding assays of four *Pieris* butterfly larvae on 25 different Brassicaceae plants ( $n = 6$ ). The four  
549 *Pieris* butterfly species generally grew better on *Cardamine occulta* but could not use *B. incana* or  
550 *E. cheiranthoides* as optimal hosts. Overall larval performance patterns of the four *Pieris* species  
551 could be clustered in two groups: *P. napi* – *melete* and *P. rapae* – *brassicae*. *P. napi* and *P. melete*  
552 larvae grew better on *Arabis hirsuta* or *Turritis glabra*, and *P. rapae* and *P. brassicae* larvae grew  
553 better on *Thlaspi arvense*.  
554

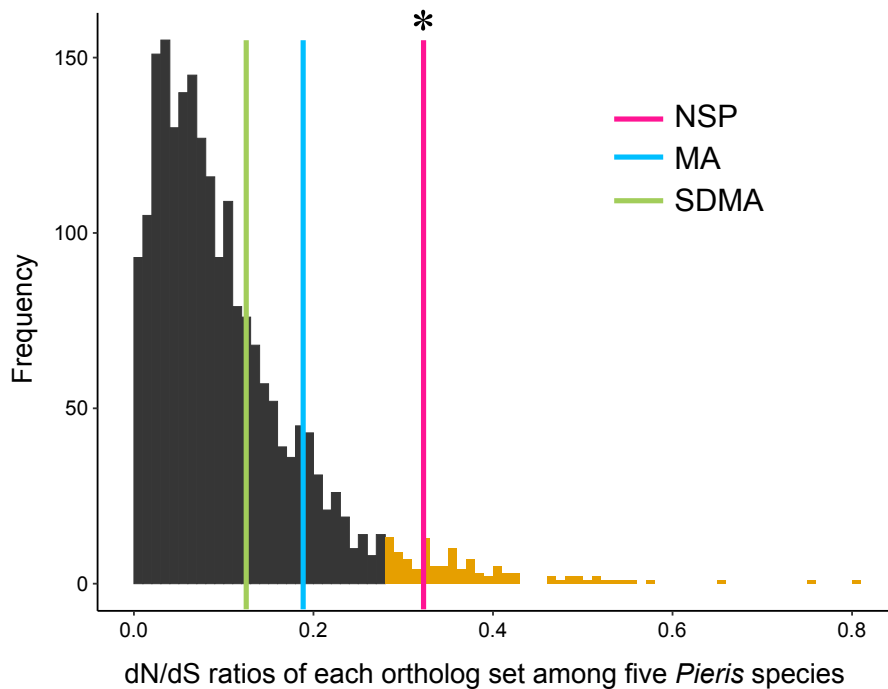

555  
556 **Fig. 4**  
557 The averaged distribution of dN/dS values within each ortholog among the five *Pieris* species ( $n =$   
558 2723). The top 5% values in the histogram are colored orange. The vertical lines show dN/dS values  
559 of NSP-like gene family members; NSP (pink) = 0.324, MA (blue) = 0.188 and SDMA (green) =  
560 0.125. ‘\*’ shows the line is in the top 5%. The dN/dS values of NSP are located in the top 5% of  
561 the entire dN/dS distribution (NSPs are located in 2.72%), whereas those of MAs and SDMAs are  
562 not (MAs 11.4%, SDMAs 23.4%).  
563

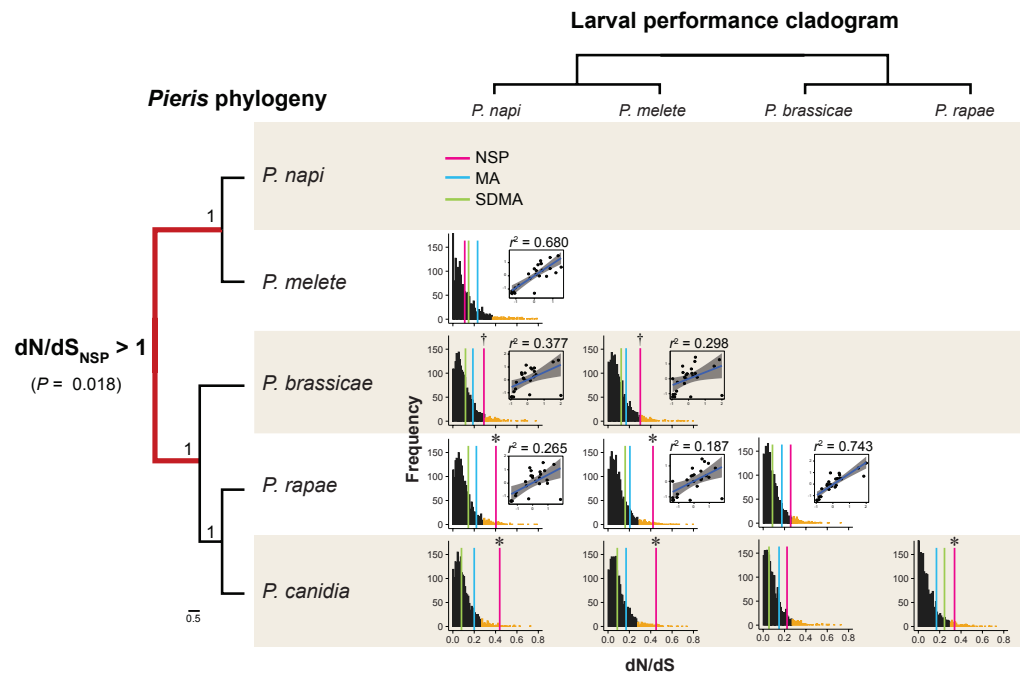

564  
565 **Fig. 5**  
566 The species pairwise dN/dS values compared with the results of feeding behavior of *Pieris*  
567 butterflies. The histograms showed distributions of species pairwise dN/dS values of entire  
568 ortholog sets (showing only from  $0 \leq dN/dS \leq 0.8$  for displaying in scale and the top 5% are  
569 colored orange). The positions of each NSP-like gene family member are highlighted with  
570 colored vertical lines (NSP: pink, MA: blue, SDMA: green). Symbols on the lines show ranking  
571 (\*: in the top 5%, †: in the top 5.5%). The scatterplots show the larval growth of each pair of  
572 *Pieris* species except for *P. canidia*. A phylogenetic tree was reconstructed by all the aligned  
573 contigs of the five *Pieris* species with bootstrapping support in each node. We found a signature  
574 of positive selection in NSPs at the *P. melete* and *P. napi* branch (left phylogeny: *P* = 0.018,  
575 LRT), which is also supported by significantly elevated dN/dS values of NSP in the species pairs  
576 at the phylogenetic branch (*P. napi* - *P. rapae*, *P. napi* - *P. brassicae*, *P. melete* - *P. rapae*, *P.*  
577 *melete* - *P. brassicae*). Furthermore, dissimilarities in larval performance correlated with elevated  
578 dN/dS values of NSPs.  
579

580

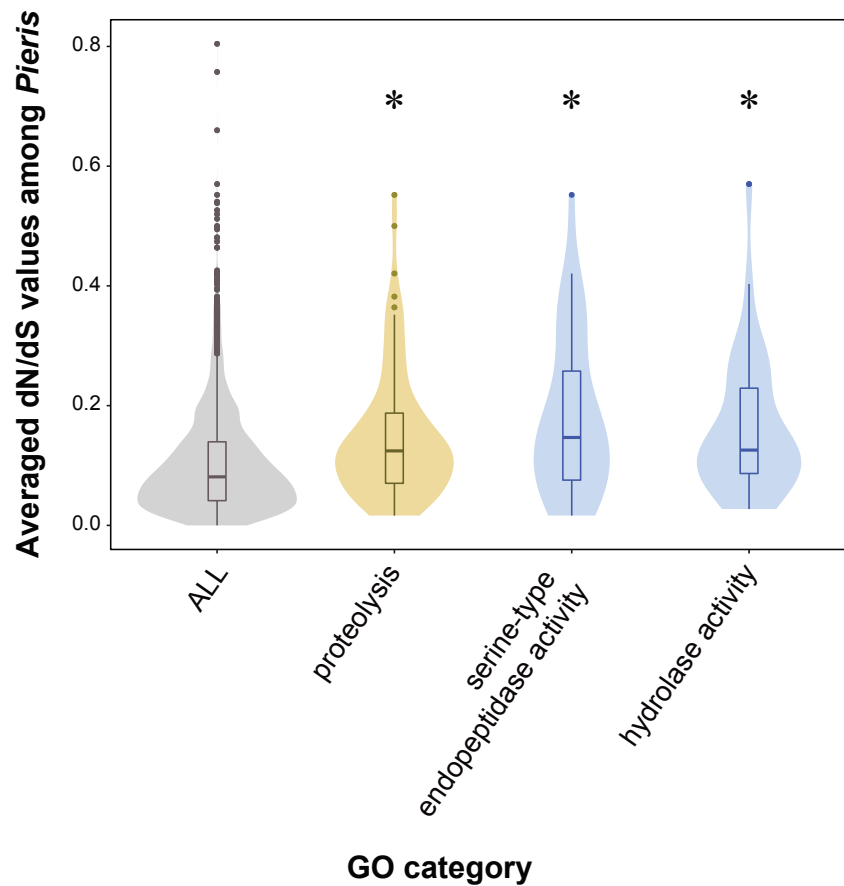

581

582

**Fig. 6**

583 GO terms which have significantly elevated dN/dS values compared to those of entire ortholog sets  
584 among *Pieris*. Elevated dN/dS values were observed in “proteolysis” from biological process  
585 (orange), and “serine-type endopeptidase activity” and “hydrolase activity” from molecular  
586 function (blue) compared to the entire distribution of all the observed contigs among *Pieris*.  
587 Comparisons with other enriched GO terms are shown in Table 3. “\*”:  $P$  values are adjusted by  
588 FDR;  $P \leq 0.05$ , Wilcoxon test.

589

## Tables

**Table 1 Branch-specific selection tests on NSP-like gene family by codeml**

| Gene                             | Branch name                      | lnL <i>Model null</i>          | lnL <i>Model alt</i> | delta L     | P value (FDR adjust.) | BEB site p > 0.9                |
|----------------------------------|----------------------------------|--------------------------------|----------------------|-------------|-----------------------|---------------------------------|
| NSP                              | <b><i>P. napi - melete</i></b>   | <b>-3816.12</b>                | <b>-3811.56</b>      | <b>9.11</b> | <b>0.018</b>          | <b>421 E 0.918, 503 R 0.960</b> |
|                                  | <i>P. rapae - canidia</i> branch | -3816.98                       | -3816.68             | 0.6         | 1                     |                                 |
|                                  | <i>P. napi</i>                   | -3817.87                       | -3817.87             | 0           | 1                     |                                 |
|                                  | <i>P. melete</i>                 | -3817.87                       | -3817.87             | 0           | 1                     |                                 |
|                                  | <i>P. brassicae</i>              | -3817.87                       | -3817.87             | 0           | 1                     |                                 |
|                                  | <i>P. rapae</i>                  | -3816.44                       | -3816.44             | 0           | 1                     |                                 |
|                                  | <i>P. canidia</i>                | -3817.87                       | -3817.87             | 0           | 1                     |                                 |
|                                  | MA                               | <i>P. napi - melete</i> branch | -4173.71             | -4172.82    | 1.77                  | 0.549                           |
| <i>P. rapae - canidia</i> branch |                                  | -4172.77                       | -4170.79             | 3.96        | 0.279                 |                                 |
| <i>P. napi</i>                   |                                  | -4171.43                       | -4171.43             | 0           | 1                     |                                 |
| <i>P. melete</i>                 |                                  | -4173.71                       | -4173.71             | 0           | 1                     |                                 |
| <i>P. brassicae</i>              |                                  | -4173.71                       | -4173.71             | 0           | 1                     |                                 |
| <i>P. rapae</i>                  |                                  | -4171.88                       | -4171.88             | 0           | 1                     |                                 |
| <i>P. canidia</i>                |                                  | -4173.71                       | -4173.71             | 0           | 1                     |                                 |
| SDMA                             |                                  | <i>P. napi - melete</i> branch | -1198.58             | -1198.58    | 0                     | 1                               |
|                                  | <i>P. rapae - canidia</i> branch | -1198.58                       | -1198.58             | 0           | 1                     |                                 |
|                                  | <i>P. napi</i>                   | -1198.57                       | -1198.57             | 0           | 1                     |                                 |
|                                  | <i>P. melete</i>                 | -1198.03                       | -1196.39             | 3.28        | 0.490                 | 123 M 0.910                     |
|                                  | <i>P. brassicae</i>              | -1198.58                       | -1198.58             | 0           | 1                     |                                 |
|                                  | <i>P. rapae</i>                  | -1196.17                       | -1196.16             | 0.02        | 1                     |                                 |
|                                  | <i>P. canidia</i>                | -1198.58                       | -1198.58             | 0           | 1                     |                                 |

lnL *Model null*: log likelihood for null model with fixed dN/dS ratios. lnL *Model alt*: log likelihood for alternative model which allows having unfixed dN/dS values at the branch. Delta L:  $2(\ln L \text{ Model alt} - \ln L \text{ Model null})$  for the likelihood ratio test (LRT). P values are from LRT and adjusted for multiple testing. BEB analysis shows the specific sites which have significant signatures of positive selection with posterior probability. Positions are based on *P. rapae* protein sequences.

**Table 2 Branch-specific selection tests on NSP-like gene families by aBSREL**

| Gene              | Branch name                                  | LRT          | <i>P</i> value |
|-------------------|----------------------------------------------|--------------|----------------|
| NSP               | <b><i>P. napi</i> - <i>melete</i> branch</b> | <b>10.96</b> | <b>0.010</b>   |
|                   | <i>P. rapae</i> - <i>canidia</i> branch      | 5.06         | 0.067          |
|                   | <i>P. napi</i>                               | 0            | 1              |
|                   | <i>P. melete</i>                             | 5.46         | 0.067          |
|                   | <i>P. brassicae</i>                          | 2.33         | 0.208          |
|                   | <i>P. rapae</i>                              | 0            | 1              |
|                   | <i>P. canidia</i>                            | 0            | 1              |
| MA                | <i>P. napi</i> - <i>melete</i> branch        | 3.02         | 0.967          |
|                   | <i>P. rapae</i> - <i>canidia</i> branch      | 4.43         | 0.967          |
|                   | <i>P. napi</i>                               | 0            | 1              |
|                   | <i>P. melete</i>                             | 0            | 1              |
|                   | <i>P. brassicae</i>                          | 0.96         | 1              |
|                   | <i>P. rapae</i>                              | 0            | 1              |
| SDMA              | <i>P. canidia</i>                            | 4.27         | 0.967          |
|                   | <i>P. napi</i> - <i>melete</i> branch        | 0            | 1              |
|                   | <i>P. rapae</i> - <i>canidia</i> branch      | 0.49         | 1              |
|                   | <i>P. napi</i>                               | 0            | 1              |
|                   | <i>P. melete</i>                             | 4.38         | 1              |
|                   | <i>P. brassicae</i>                          | 0            | 1              |
|                   | <i>P. rapae</i>                              | 0            | 1              |
| <i>P. canidia</i> | 0                                            | 1            |                |

LRT: Likelihood ratio test statistic for selection. *P* values are adjusted by false discovery rates.

**Table 3 GO terms with elevated or decreased dN/dS values corresponding to entire orthologs.**

ALL: all the orthologs with assigned GO term. N: number of orthologs in the GO term. *P* values are adjusted with false discovery rates. GO terms with elevated dN/dS values are in bold.

| GO term                                    | N         | dN/dS mean   | <i>P</i> value*      | up/down to ALL |
|--------------------------------------------|-----------|--------------|----------------------|----------------|
| <b>ALL</b>                                 | 2113      | 0.105        | -                    |                |
| <b>Biological process</b>                  |           |              |                      |                |
| oxidation-reduction process                | 109       | 0.103        | 0.514                |                |
| <b>proteolysis</b>                         | <b>88</b> | <b>0.149</b> | <b>&lt;0.001</b> *** | <b>up</b>      |
| regulation of transcription, DNA-templated | 88        | 0.070        | 0.000 ***            | down           |
| transmembrane transport                    | 60        | 0.093        | 0.790                |                |
| ribosome biogenesis                        | 39        | 0.057        | 0.001 ***            | down           |
| carbohydrate metabolic process             | 38        | 0.105        | 0.551                |                |
| translation                                | 34        | 0.058        | 0.002 **             | down           |
| signal transduction                        | 28        | 0.083        | 0.361                |                |
| protein phosphorylation                    | 27        | 0.071        | 0.185                |                |
| phosphorylation                            | 26        | 0.115        | 0.517                |                |
| methylation                                | 21        | 0.130        | 0.253                |                |
| purine nucleobase metabolic process        | 21        | 0.087        | 0.551                |                |
| <b>Molecular function</b>                  |           |              |                      |                |
| ATP binding                                | 158       | 0.075        | 0.001 ***            | down           |
| nucleic acid binding                       | 100       | 0.120        | 0.237                |                |
| zinc ion binding                           | 99        | 0.110        | 0.443                |                |
| metal ion binding                          | 83        | 0.123        | 0.080                |                |
| DNA binding                                | 81        | 0.096        | 0.295                |                |
| RNA binding                                | 72        | 0.091        | 0.312                |                |
| structural constituent of ribosome         | 36        | 0.058        | 0.002 **             | down           |
| oxidoreductase activity                    | 32        | 0.118        | 0.112                |                |
| <b>hydrolase activity</b>                  | <b>32</b> | <b>0.164</b> | <b>0.002</b> **      | <b>up</b>      |
| GTP binding                                | 32        | 0.073        | 0.017 *              | down           |

|                                           |           |              |              |           |           |
|-------------------------------------------|-----------|--------------|--------------|-----------|-----------|
| <b>serine-type endopeptidase activity</b> | <b>30</b> | <b>0.182</b> | <b>0.002</b> | <b>**</b> | <b>up</b> |
| transmembrane transporter activity        | 29        | 0.092        | 0.662        |           |           |
| calcium ion binding                       | 27        | 0.053        | 0.002        | **        | down      |
| DNA-binding transcription factor activity | 26        | 0.064        | 0.028        | *         | down      |
| sequence-specific DNA binding             | 25        | 0.040        | <0.001       | ***       | down      |
| transferase activity                      | 24        | 0.088        | 0.408        |           |           |
| ligase activity                           | 24        | 0.104        | 0.112        |           |           |
| GTPase activity                           | 22        | 0.076        | 0.091        |           |           |
| kinase activity                           | 21        | 0.117        | 0.567        |           |           |
| helicase activity                         | 21        | 0.098        | 0.848        |           |           |
| methyltransferase activity                | 20        | 0.125        | 0.327        |           |           |
| iron ion binding                          | 20        | 0.112        | 0.379        |           |           |
| <b>Cellular component</b>                 |           |              |              |           |           |
| integral component of membrane            | 479       | 0.103        | 0.477        |           |           |
| nucleus                                   | 164       | 0.088        | 0.002        | **        | down      |
| cytoplasm                                 | 64        | 0.087        | 0.036        | *         | down      |
| ribosome                                  | 62        | 0.071        | 0.017        | *         | down      |
| extracellular region                      | 41        | 0.110        | 0.477        |           |           |
| intracellular                             | 32        | 0.088        | 0.477        |           |           |
| transcription factor complex              | 30        | 0.063        | 0.017        | *         | down      |
| membrane                                  | 22        | 0.124        | 0.541        |           |           |
| mitochondrion                             | 20        | 0.109        | 0.509        |           |           |

FDR adjusted  $P$  value: “\*” < 0.05, “\*\*” < 0.01, “\*\*\*” < 0.001
